# Supplementary material for: Using Co-Production to Develop “Sit Less at Work” Interventions in a Range of Organisations
Source: MDPI journal article supplement (doi:10.3390/ijerph18157751), 2021-07-22
Supplement: s1 [file s1]

**Table S7a.** Large corporation 12-week “Sit Less at Work” intervention summary

| Week | Action 1                                                                          | Action 2                                    | Action 3                                                          |
|------|-----------------------------------------------------------------------------------|---------------------------------------------|-------------------------------------------------------------------|
| 1    | Weekly email from Area Manager with sit less suggestions<br>(Intra, Inter & Org*) |                                             |                                                                   |
| 2    | Weekly email from Area Manager with sit less suggestions                          | Weekly sit less challenge<br>(Inter & Org*) |                                                                   |
| 3    | Weekly email from Area Manager with sit less suggestions                          | Weekly sit less challenge                   |                                                                   |
| 4    | Weekly email from Area Manager with sit less suggestions                          | Weekly sit less challenge                   | Incorporate activity into monthly team meetings<br>(Inter & Org*) |
| 5    | Weekly email from Area Manager with sit less suggestions                          | Weekly sit less challenge                   |                                                                   |
| 6    | Weekly email from Area Manager with sit less suggestions                          | Weekly sit less challenge                   |                                                                   |
| 7    | Weekly email from Area Manager with sit less suggestions                          | Weekly sit less challenge                   |                                                                   |
| 8    | Weekly email from Area Manager with sit less suggestions                          | Weekly sit less challenge                   | Incorporate activity into monthly team meetings                   |
| 9    | Weekly email from Area Manager with sit less suggestions                          | Weekly sit less challenge                   |                                                                   |
| 10   | Weekly email from Area Manager with sit less suggestions                          | Weekly sit less challenge                   |                                                                   |
| 11   | Weekly email from Area Manager with sit less suggestions                          | Weekly sit less challenge                   |                                                                   |
| 12   | Weekly email from Area Manager with sit less suggestions                          | Weekly sit less challenge                   | Incorporate activity into monthly team meetings                   |

\* The ecological level that each new action relates to is denoted in each table using the following abbreviations: “Intra” (intrapersonal-level), “Inter” (interpersonal-level), “Org” (organisational-level), and “Env” (environmental-level).

**Table S7b.** Large corporation detailed action plan

| Action                                                                                   | Content                                                                                                                                                                                                                                                                                                                                                                                                                                                                                                                                                               | Timing                                           | Management involvement                                            | Barriers                     | How to overcome barriers                                                                 | Who to action*                                                                                                                                          |
|------------------------------------------------------------------------------------------|-----------------------------------------------------------------------------------------------------------------------------------------------------------------------------------------------------------------------------------------------------------------------------------------------------------------------------------------------------------------------------------------------------------------------------------------------------------------------------------------------------------------------------------------------------------------------|--------------------------------------------------|-------------------------------------------------------------------|------------------------------|------------------------------------------------------------------------------------------|---------------------------------------------------------------------------------------------------------------------------------------------------------|
| <b>Weekly email from Area Manager with sit less suggestions (Intra, Inter &amp; Org)</b> | Area Manager to send an email informing team of challenge and importance of sitting less at work. Suggestions on how to sit less to be included in the email: taking the stairs not the lift; if have a FitBit – make sure you do at least 250 steps/hour and make use of prompts (vibration) it makes to do this; drink more water; stand/walk for calls; make use of the coffee app and go get your free daily coffee from Valerie Patisserie – especially on a Friday (when everyone is expected to be in the office) everyone could go together – social element. | Day 1, week 1 and then a weekly email thereafter | Area Manager to send email (template to be written by Researcher) | How to get everyone involved | Use team Whatsapp group to encourage<br><br>Use weekly call on a Monday to prompt/remind | Researcher to write email templates for each week<br><br>TA/EG to check Area Manager happy to send email and encourage participation in weekly meetings |
| <b>Weekly sit less challenge (Inter &amp; Org)</b>                                       | Use the white board next to Area Manager's desk to track everyone's steps (use FitBits or iPhones for step counts) – make it competition with yourself rather than each other – prize for biggest improver rather than who's got most steps.                                                                                                                                                                                                                                                                                                                          | Day 1, week 2                                    | Approval required from Area Manager                               | How to get everyone involved | Use team Whatsapp group to encourage<br><br>Use weekly call on a Monday to prompt/remind | TA/EG to get Area Manager approval and set-up & maintain white board progress chart<br><br>Need to decide on prize ?extra holiday days                  |

|                                                                          |                                                                                                                                                                                                                                                                                                                                                                                                                                                                                                                                                                                                                                                                                                                        |                                                                             |                                                                                   |                                               |                                                                                               |                                                                                                                                              |
|--------------------------------------------------------------------------|------------------------------------------------------------------------------------------------------------------------------------------------------------------------------------------------------------------------------------------------------------------------------------------------------------------------------------------------------------------------------------------------------------------------------------------------------------------------------------------------------------------------------------------------------------------------------------------------------------------------------------------------------------------------------------------------------------------------|-----------------------------------------------------------------------------|-----------------------------------------------------------------------------------|-----------------------------------------------|-----------------------------------------------------------------------------------------------|----------------------------------------------------------------------------------------------------------------------------------------------|
| <b>Incorporate activity into monthly team meetings (Inter &amp; Org)</b> | <p>The use of energisers, movement, “treasure hunts” and/or challenges to add activity into meetings.</p> <p>Every other meeting is in an external location – when in an external location, there could be a “treasure hunt” challenge included in the day where team members have to go out and find and take a photo of certain objects e.g. if somewhere with outside space, could take a picture of an insect – the most obscure the better.</p> <p>For external and internal meetings – could incorporate movement into the meeting e.g. coffee break – go and get free coffee from Patisserie Valerie, all team stand/walk on spot for 5 mins every hour etc, who can get the most steps in the lunch break?</p> | Three times during the 12 weeks (at team meeting which occurs once a month) | Area Manager would need to support this and put time in the agenda for activities | Busy agendas, sometimes have guests attending | Stream-line meetings, plan activity in, build it in to break times e.g. lunch / coffee breaks | <p>TA/EG to approach Area Manager to see if happy to include activity into the team meetings</p> <p>Area Manager to include into agendas</p> |
|--------------------------------------------------------------------------|------------------------------------------------------------------------------------------------------------------------------------------------------------------------------------------------------------------------------------------------------------------------------------------------------------------------------------------------------------------------------------------------------------------------------------------------------------------------------------------------------------------------------------------------------------------------------------------------------------------------------------------------------------------------------------------------------------------------|-----------------------------------------------------------------------------|-----------------------------------------------------------------------------------|-----------------------------------------------|-----------------------------------------------------------------------------------------------|----------------------------------------------------------------------------------------------------------------------------------------------|

*\* Individuals responsible for the implementation of each action were highlighted where appropriate (denoted by two random letters).*

*Note: the levels of influence each action related to is denoted as follows: “Intra” is intrapersonal, “Inter” is interpersonal, “Org” is organisational, and “Env” is environmental.*
