# Supplementary material for: Using Co-Production to Develop “Sit Less at Work” Interventions in a Range of Organisations
Source: MDPI journal article supplement (doi:10.3390/ijerph18157751), 2021-07-22
Supplement: s1 [file s1]

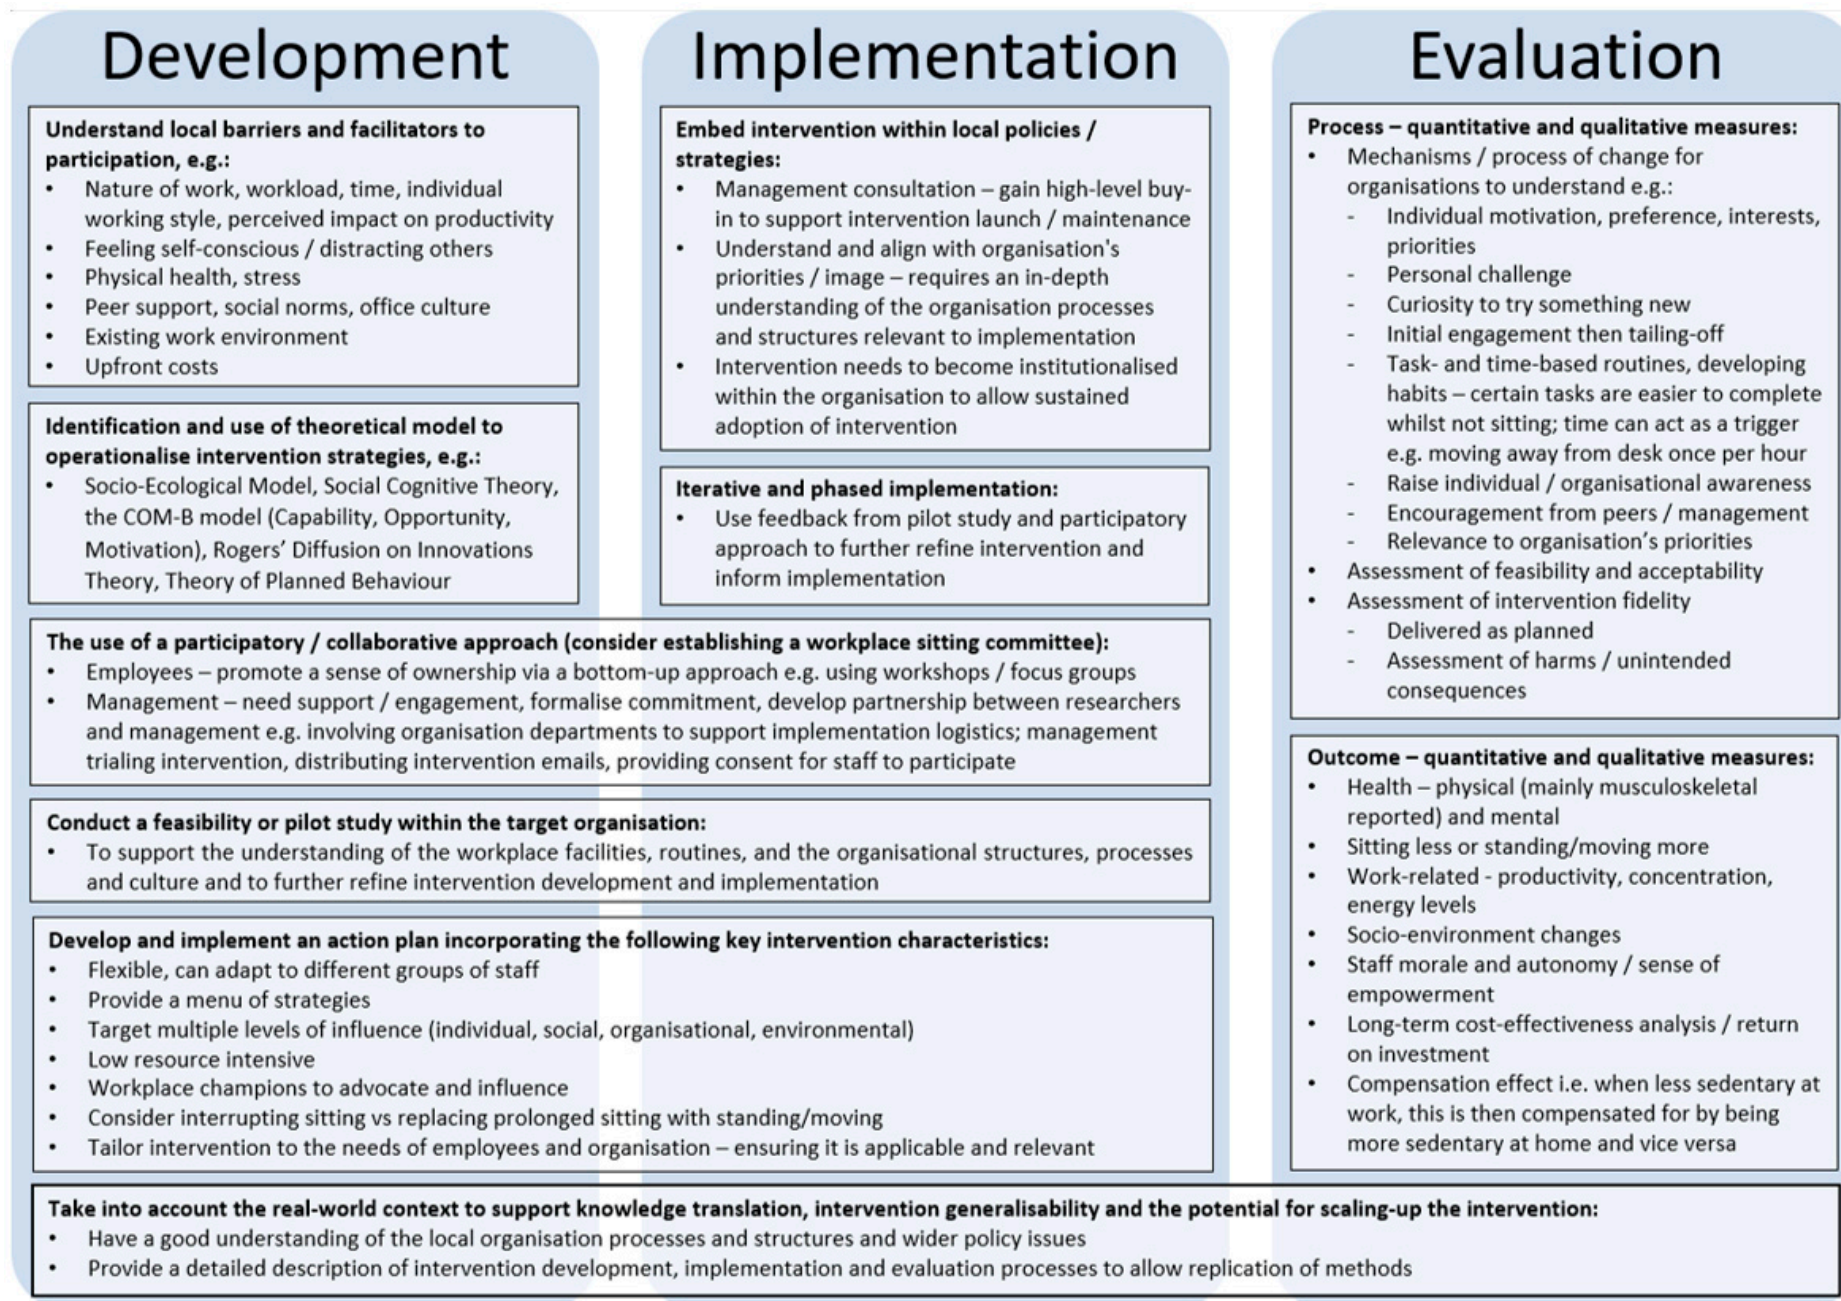

**Figure S1.** Operational framework for the development, implementation, and evaluation of interventions to reduce workplace sitting time (previously published [26])
