# Supplementary material for: Using Co-Production to Develop “Sit Less at Work” Interventions in a Range of Organisations
Source: MDPI journal article supplement (doi:10.3390/ijerph18157751), 2021-07-22
Supplement: s1 [file s1]

**Table S2.** Intervention planning proforma

| Action | Content | Timing | Management involvement | Barriers | How to overcome barriers | Who to action |
|--------|---------|--------|------------------------|----------|--------------------------|---------------|
|        |         |        |                        |          |                          |               |
|        |         |        |                        |          |                          |               |
|        |         |        |                        |          |                          |               |
