# Supplementary material for: Using Co-Production to Develop “Sit Less at Work” Interventions in a Range of Organisations
Source: MDPI journal article supplement (doi:10.3390/ijerph18157751), 2021-07-22
Supplement: s1 [file s1]

**Table S1.** Organisation characteristics (previously published [34])

| <b>Characteristic</b>              | <b>Small business</b>                                                                                                                        | <b>Charity</b>                                                                                                                                                                                                                                              | <b>Local authority</b>                                                                                                                                                         | <b>Large corporation</b>                                                                                                                       |
|------------------------------------|----------------------------------------------------------------------------------------------------------------------------------------------|-------------------------------------------------------------------------------------------------------------------------------------------------------------------------------------------------------------------------------------------------------------|--------------------------------------------------------------------------------------------------------------------------------------------------------------------------------|------------------------------------------------------------------------------------------------------------------------------------------------|
| <b>Total number of employees</b>   | 8                                                                                                                                            | 488                                                                                                                                                                                                                                                         | 4,146                                                                                                                                                                          | 119,300*                                                                                                                                       |
| <b>Sector</b>                      | Private                                                                                                                                      | Voluntary                                                                                                                                                                                                                                                   | Public                                                                                                                                                                         | Private                                                                                                                                        |
| <b>Description of organisation</b> | Provides information technology support to a range of other businesses and comprised one Managing Director, two managers and five employees. | Manages homes, and provides care and support to vulnerable people. Departments include: Directors, Computer Services, Finance, Customer Services, Human Resources, Performance and Central Services, New Business, Housing Services, and Property Services. | Set in a Metropolitan Borough. Work covers four Directorates: Adults, Health and Wellbeing; Corporate Resources; Learning and Opportunities; and Regeneration and Environment. | Banking business. Only one branch participated. This branch had both business and corporate teams and comprised 25 staff and two team leaders. |
