# Supplementary material for: Using Co-Production to Develop “Sit Less at Work” Interventions in a Range of Organisations
Source: MDPI journal article supplement (doi:10.3390/ijerph18157751), 2021-07-22
Supplement: s1 [file s1]

**Table S3.** Outputs from Workshop 1 for each organisation by level of influence

| Ideas                | Small business                                                                                                                                                                                                                                                                                                                                                                               | Charity                                                                                                                                                                                                                                                                                                                                                                                                                                                                                                                                                                                                                                                                                                                                                                                                                                                                | Local authority                                                                                                                                                                                                                                                                                                                                                                                                                                                                                                                                                                                                                               | Large corporation                                                                                                                                                                                                                                                                                                                                                                                                        |
|----------------------|----------------------------------------------------------------------------------------------------------------------------------------------------------------------------------------------------------------------------------------------------------------------------------------------------------------------------------------------------------------------------------------------|------------------------------------------------------------------------------------------------------------------------------------------------------------------------------------------------------------------------------------------------------------------------------------------------------------------------------------------------------------------------------------------------------------------------------------------------------------------------------------------------------------------------------------------------------------------------------------------------------------------------------------------------------------------------------------------------------------------------------------------------------------------------------------------------------------------------------------------------------------------------|-----------------------------------------------------------------------------------------------------------------------------------------------------------------------------------------------------------------------------------------------------------------------------------------------------------------------------------------------------------------------------------------------------------------------------------------------------------------------------------------------------------------------------------------------------------------------------------------------------------------------------------------------|--------------------------------------------------------------------------------------------------------------------------------------------------------------------------------------------------------------------------------------------------------------------------------------------------------------------------------------------------------------------------------------------------------------------------|
| <b>Intrapersonal</b> | <ul style="list-style-type: none"> <li>• Lunch trip by foot</li> <li>• Walk to shop / Tesco</li> <li>• APP-alarm walk</li> <li>• Stand-up regularly</li> <li>• Stand-up when on a phone call</li> <li>• Make office manager coffee every 2 hours</li> <li>• Break every hour</li> <li>• Raise awareness</li> <li>• Switch monitor off</li> <li>• Lying down</li> <li>• Run a mile</li> </ul> | <ul style="list-style-type: none"> <li>• Podcasts / voice memos vs docs / emails – walk and listen</li> <li>• Personal behaviour / self-discipline – challenge yourself to move away from your desk for 10 minutes every hour</li> <li>• Seek out people at their desk rather than email or phone – keep the door open your office to facilitate this</li> <li>• Personal targets for steps/day and track activity using FitBit, or pedometers, record steps to see benefit of “walking / standing day”</li> <li>• Walk to work 1 day a week or getting off public transport earlier and walking the rest</li> <li>• Take regular short breaks</li> <li>• Use the stairs and not the lift</li> <li>• Make your own drinks</li> <li>• Lunch outside office, walk to get lunch (don’t bring your own food all the time)</li> <li>• Get out of the office more</li> </ul> | <ul style="list-style-type: none"> <li>• Walk over to talk to people</li> <li>• Don’t always book meeting rooms on the floor that you work on</li> <li>• Walk up and down a floor for exercise during the day</li> <li>• Over lunch go for a walk</li> <li>• Use stairs instead of lift</li> <li>• Join exercise class / informal exercise gear in the atrium</li> <li>• App on phone – if not moved, you get a prompt, reminder to get up regularly</li> <li>• Stand on a regular basis</li> <li>• Walk to meetings locally</li> <li>• Active travel to work – walk / cycle – if you live too far away, get off a few stops early</li> </ul> | <ul style="list-style-type: none"> <li>• Use stairs not lift</li> <li>• Take action with FitBit prompts to move</li> <li>• Plan diary</li> <li>• Drink more water</li> <li>• Stand-up for calls</li> <li>• Use coffee app (get free coffee at Patisserie Valarie each day)</li> <li>• Be more mindful</li> <li>• Messages that moving more is good, can transform the body, fidgeting good, limit time seated</li> </ul> |

|                      |                                                                                                                                                                                                                                                                                                                                                                                                            |                                                                                                                                                                                                                                                                                                                                                                                                                                                                                                                                  |                                                                                                                                                                                                                                                                                                                                                                                                                                                                                                                                                                                                           |                                                                                                                                                                                                                                                                                                                                                                       |
|----------------------|------------------------------------------------------------------------------------------------------------------------------------------------------------------------------------------------------------------------------------------------------------------------------------------------------------------------------------------------------------------------------------------------------------|----------------------------------------------------------------------------------------------------------------------------------------------------------------------------------------------------------------------------------------------------------------------------------------------------------------------------------------------------------------------------------------------------------------------------------------------------------------------------------------------------------------------------------|-----------------------------------------------------------------------------------------------------------------------------------------------------------------------------------------------------------------------------------------------------------------------------------------------------------------------------------------------------------------------------------------------------------------------------------------------------------------------------------------------------------------------------------------------------------------------------------------------------------|-----------------------------------------------------------------------------------------------------------------------------------------------------------------------------------------------------------------------------------------------------------------------------------------------------------------------------------------------------------------------|
|                      |                                                                                                                                                                                                                                                                                                                                                                                                            | <ul style="list-style-type: none"> <li>• Centralised kitchen, storage, toilets – go and collect rather than delivery</li> <li>• Encourage others to be active</li> <li>• Be a positive influence for team, show good behaviours and reinforce cultural change</li> <li>• Stand on one foot when making drinks etc.</li> <li>• Drink more water</li> <li>• Understand the links between sitting and health</li> </ul>                                                                                                             |                                                                                                                                                                                                                                                                                                                                                                                                                                                                                                                                                                                                           |                                                                                                                                                                                                                                                                                                                                                                       |
| <b>Interpersonal</b> | <ul style="list-style-type: none"> <li>• Help support others</li> <li>• Hi-fives</li> <li>• Wii games, SNES</li> <li>• Walk to the Stag (pub)</li> <li>• Ping pong</li> <li>• Yoga</li> <li>• Sub-teams – pairs am/pm walks</li> <li>• Paired exercises</li> <li>• Competitions – press-ups etc.</li> <li>• Company dog to walk</li> <li>• Dance competition</li> <li>• All go to gym and bench</li> </ul> | <ul style="list-style-type: none"> <li>• Lunchtime bike or walking group or other activities group</li> <li>• Go out once a week as a group to encourage each other</li> <li>• Work together to help change collective behaviours</li> <li>• Hold team meetings stood up</li> <li>• Team competition or incentive – who's sat least this week (use FitBit / pedometers to measure)?</li> <li>• Challenge the norm of sitting down each meeting</li> <li>• Don't get each other a drink – all get up and make your own</li> </ul> | <ul style="list-style-type: none"> <li>• Encourage others to move about</li> <li>• Activity based team day</li> <li>• Every hour, whole team stands up for 5+ minutes and stretches legs / back / arms</li> <li>• Informal office sports / games</li> <li>• Step competitions – pedometer, daily, weekly, monthly</li> <li>• Walking / running group</li> <li>• Community team group e.g. litter pick</li> <li>• Charity walk</li> <li>• Standing team meetings</li> <li>• 1 day per week, all working at standing desks</li> <li>• Engage / interact with different people in different areas</li> </ul> | <ul style="list-style-type: none"> <li>• Introduce “energisers” to meetings</li> <li>• Build activity into team meetings</li> <li>• Be more diverse with settings for team meetings</li> <li>• Team challenges / competitions on iPhone etc. aim for a certain amount of steps – use colour charts to monitor – red bad, get paler the more active you are</li> </ul> |

|                       |                                                                                                                                                                                                                                                                                                                                                                                                                                                                                                                                                                                                                                                    |                                                                                                                                                                                                                                                                                                                                                                                                                                                                                                                                                                    |                                                                                                                                                                                                                                                                                                                                                                                                                                                                                                                                                                                                     |                                                                                                                                                                                                                 |
|-----------------------|----------------------------------------------------------------------------------------------------------------------------------------------------------------------------------------------------------------------------------------------------------------------------------------------------------------------------------------------------------------------------------------------------------------------------------------------------------------------------------------------------------------------------------------------------------------------------------------------------------------------------------------------------|--------------------------------------------------------------------------------------------------------------------------------------------------------------------------------------------------------------------------------------------------------------------------------------------------------------------------------------------------------------------------------------------------------------------------------------------------------------------------------------------------------------------------------------------------------------------|-----------------------------------------------------------------------------------------------------------------------------------------------------------------------------------------------------------------------------------------------------------------------------------------------------------------------------------------------------------------------------------------------------------------------------------------------------------------------------------------------------------------------------------------------------------------------------------------------------|-----------------------------------------------------------------------------------------------------------------------------------------------------------------------------------------------------------------|
|                       |                                                                                                                                                                                                                                                                                                                                                                                                                                                                                                                                                                                                                                                    | <ul style="list-style-type: none"> <li>• Remind one another you've been sat a long time</li> <li>• Support each other – it's ok not to be sat at desk all the time</li> <li>• Booking in standing or walking meetings</li> <li>• Take short breaks – colleagues cover front desk and serve</li> <li>• Outdoor 1:1 meetings</li> </ul>                                                                                                                                                                                                                              | <ul style="list-style-type: none"> <li>• Teams to learn how to dance</li> </ul>                                                                                                                                                                                                                                                                                                                                                                                                                                                                                                                     |                                                                                                                                                                                                                 |
| <b>Organisational</b> | <ul style="list-style-type: none"> <li>• Policy for moving, water policy / wee policy</li> <li>• Impose rules</li> <li>• Change attitude to sitting</li> <li>• Stand up or “get gunged”</li> <li>• Notification to move / stand</li> <li>• Reward for sitting less</li> <li>• Pedometer / FitBit (or individual?)</li> <li>• Organised activities</li> <li>• Bring back PT day</li> <li>• Work upstairs with phones, downstairs LOL</li> <li>• Regular game</li> <li>• Utilise own technology to force</li> <li>• Electrocute chairs if sat for &gt;2 hours</li> <li>• Pay gym memberships</li> <li>• Gaming rehab “operation sit less”</li> </ul> | <ul style="list-style-type: none"> <li>• Celebrate changes / achievements, Tell us your sit less stories</li> <li>• Hot-desking (working in teams) – need support from IT</li> <li>• Change the culture that you are only working at your “station”</li> <li>• Build activity into team meetings</li> <li>• Encourage people to lunch together</li> <li>• Encourage spontaneity from staff</li> <li>• No lunch at desk</li> <li>• Car-free day</li> <li>• Email-free day</li> <li>• No meetings longer than 1 hour</li> <li>• Shorter stand-up meetings</li> </ul> | <ul style="list-style-type: none"> <li>• Raise awareness in terms of health benefits including stress relief</li> <li>• More exercise / health / wellbeing messaging with practical encouragement e.g. 1 day a week no lifts</li> <li>• Financial incentive / flexi to get up for a period throughout the day</li> <li>• Traffic light system for how well we are doing – reward system</li> <li>• Over the tano – “Hi di hi!” and stand up</li> <li>• Standing meetings</li> <li>• Walking meetings</li> <li>• Flash up message on Jabber etc.</li> <li>• Encouragement from management</li> </ul> | <ul style="list-style-type: none"> <li>• Extra holidays for logging active hours or other rewards system</li> <li>• Run challenges for points / prizes</li> <li>• Make rewards site easier to access</li> </ul> |

|                      |                                                                                                                                                                  |                                                                                                                                                                                                                                                                                                                                                                                                                                                                                                                                                                                                                                                                                                                                                                                     |                                                                                                                                                                                                                                                                                                                                                                                                                                                                                                                                                                                                                                                                                                                                                                                                                                                                      |                                                                                                                                     |
|----------------------|------------------------------------------------------------------------------------------------------------------------------------------------------------------|-------------------------------------------------------------------------------------------------------------------------------------------------------------------------------------------------------------------------------------------------------------------------------------------------------------------------------------------------------------------------------------------------------------------------------------------------------------------------------------------------------------------------------------------------------------------------------------------------------------------------------------------------------------------------------------------------------------------------------------------------------------------------------------|----------------------------------------------------------------------------------------------------------------------------------------------------------------------------------------------------------------------------------------------------------------------------------------------------------------------------------------------------------------------------------------------------------------------------------------------------------------------------------------------------------------------------------------------------------------------------------------------------------------------------------------------------------------------------------------------------------------------------------------------------------------------------------------------------------------------------------------------------------------------|-------------------------------------------------------------------------------------------------------------------------------------|
|                      |                                                                                                                                                                  | <ul style="list-style-type: none"> <li>• IT system prompt if on PC for over 2 hours (or specified time)</li> <li>• Incentivise stair use, de-incentivise lift use</li> <li>• Incentives – encouragement to walk to other side of building for a snack, reward for walking/steps</li> <li>• Encourage walking / steps competitions</li> <li>• Walk, talk, email – re-order people’s responses</li> <li>• Changes in policies and guidelines</li> <li>• Walking and thinking</li> <li>• Give permission so feel able to leave desk</li> <li>• Encourage persistence with initiatives such as walking 1:1s</li> <li>• Programme of standing activities e.g. yoga et</li> <li>• Mobile phones so you don’t have to stay at your desks</li> <li>• Invest in mobile technology</li> </ul> | <ul style="list-style-type: none"> <li>• Include motivation around improving health and wellbeing in 1:1s</li> <li>• Guidance and employee support of how to move more e.g. ideas of good stretches to do at your desk</li> <li>• Policy, guidelines, information, suggestions, permission to do</li> <li>• Continue to promote active travel</li> <li>• Make activity breaks as “acceptable” as smoke breaks used to be – less rigid with clear desks policies etc.</li> <li>• Freedom to move around</li> <li>• Maintain the pool cycles better and promote them more – pool cars under 3 or 4 miles, check why not cycled?</li> <li>• Get someone else in to show us how to do it properly e.g. Google type</li> <li>• Change Draconian clear desks policy</li> <li>• Enforced activity break</li> <li>• Exercise classes e.g. Zumba, step class, yoga</li> </ul> |                                                                                                                                     |
| <b>Environmental</b> | <ul style="list-style-type: none"> <li>• Kneel stool</li> <li>• Weighted mice</li> <li>• Wireless / longer headset cable</li> <li>• Office dumb-bells</li> </ul> | <ul style="list-style-type: none"> <li>• Rooftop track (in new building)</li> <li>• High tables to have stand-up meetings</li> </ul>                                                                                                                                                                                                                                                                                                                                                                                                                                                                                                                                                                                                                                                | <ul style="list-style-type: none"> <li>• Under-desk cycling pedals</li> <li>• Standing desks in meeting rooms – poser tables</li> <li>• More standing desks – 1 per bank of 6 desks</li> </ul>                                                                                                                                                                                                                                                                                                                                                                                                                                                                                                                                                                                                                                                                       | <ul style="list-style-type: none"> <li>• Stability balls for seats</li> <li>• Standing hot-desk, option of standing desk</li> </ul> |

|  |                                                                                                                                                                                                                                                                                                                                                                                                                                                                                        |                                                                                                                                                                                                                                                                                                                                                                                                                                                                                                                                                                                                                                                                                                                                                                                                                                                                                                                                                                                   |                                                                                                                                                                                                                                                                                                                                                                                                                                                                                                                                                                             |  |
|--|----------------------------------------------------------------------------------------------------------------------------------------------------------------------------------------------------------------------------------------------------------------------------------------------------------------------------------------------------------------------------------------------------------------------------------------------------------------------------------------|-----------------------------------------------------------------------------------------------------------------------------------------------------------------------------------------------------------------------------------------------------------------------------------------------------------------------------------------------------------------------------------------------------------------------------------------------------------------------------------------------------------------------------------------------------------------------------------------------------------------------------------------------------------------------------------------------------------------------------------------------------------------------------------------------------------------------------------------------------------------------------------------------------------------------------------------------------------------------------------|-----------------------------------------------------------------------------------------------------------------------------------------------------------------------------------------------------------------------------------------------------------------------------------------------------------------------------------------------------------------------------------------------------------------------------------------------------------------------------------------------------------------------------------------------------------------------------|--|
|  | <ul style="list-style-type: none"> <li>• Electric rising desks / varidesk</li> <li>• Standing desks and stool</li> <li>• Standing desks with stool</li> <li>• Supply treadmill desks</li> <li>• Uncomfortable chairs – make you stand-up</li> <li>• Wind-up coffee machine (bike)</li> <li>• Exercise bike</li> <li>• Cross-trainer</li> <li>• Shower room</li> <li>• Waterslide, standing hot tub</li> <li>• Bigger, got to run further</li> <li>• Move closer to the park</li> </ul> | <ul style="list-style-type: none"> <li>• Signage – calories burnt on the stairs, lift sign directing to stairs</li> <li>• More interactive spaces</li> <li>• Outside desk space for own equipment / meetings</li> <li>• More stand-up areas, less chairs</li> <li>• Chairs stacked as standard in meeting rooms or remove chairs – less likely to sit down</li> <li>• Different positioned chairs</li> <li>• Psychology of supermarkets – removing bins, redesign office regularly (teams etc.)</li> <li>• Clear office / desk – get up to get what you need</li> <li>• Storage space for workout gear</li> <li>• External venues for meetings</li> <li>• VR / AR / MR technology – interact with IT</li> <li>• Moving location with arrival of volunteers</li> <li>• Screens on the wall, not desk height</li> <li>• Take wheels off chairs</li> <li>• Gym at work and showers nearby</li> <li>• Activity areas – arm bike, weight machines, pedals, vibrating plates</li> </ul> | <ul style="list-style-type: none"> <li>• Phone change e.g. walk around when talking on the phone</li> <li>• Alternative seating e.g. exercise balls, sit-stand chairs (stools that you can lean on), one uncomfortable chair in each work area</li> <li>• Landscape private outdoor space</li> <li>• Walking route round the office or on the roof</li> <li>• Sporting room e.g. table tennis, snooker, pool, air hockey, Wii, virtual reality</li> <li>• Gym and facilities</li> <li>• Informal exercise area downstairs</li> <li>• Relaxation zone / bean bags</li> </ul> |  |
|--|----------------------------------------------------------------------------------------------------------------------------------------------------------------------------------------------------------------------------------------------------------------------------------------------------------------------------------------------------------------------------------------------------------------------------------------------------------------------------------------|-----------------------------------------------------------------------------------------------------------------------------------------------------------------------------------------------------------------------------------------------------------------------------------------------------------------------------------------------------------------------------------------------------------------------------------------------------------------------------------------------------------------------------------------------------------------------------------------------------------------------------------------------------------------------------------------------------------------------------------------------------------------------------------------------------------------------------------------------------------------------------------------------------------------------------------------------------------------------------------|-----------------------------------------------------------------------------------------------------------------------------------------------------------------------------------------------------------------------------------------------------------------------------------------------------------------------------------------------------------------------------------------------------------------------------------------------------------------------------------------------------------------------------------------------------------------------------|--|

|  |  |                                                                                                                                                                                                                                                                                                                                          |  |  |
|--|--|------------------------------------------------------------------------------------------------------------------------------------------------------------------------------------------------------------------------------------------------------------------------------------------------------------------------------------------|--|--|
|  |  | <ul style="list-style-type: none"> <li>• Reduce numbers of stairs</li> <li>• Treadmills around the building</li> <li>• Treadmill desks</li> <li>• Desks that can raise, Higher level desks with no seats, or desks that raise and lower</li> <li>• Hot-desking with standing desks</li> <li>• Standing desks with high chairs</li> </ul> |  |  |
|--|--|------------------------------------------------------------------------------------------------------------------------------------------------------------------------------------------------------------------------------------------------------------------------------------------------------------------------------------------|--|--|
