# Supplementary material for: Using Co-Production to Develop “Sit Less at Work” Interventions in a Range of Organisations
Source: Int J Environ Res Public Health. 2021 Jul 22;18(15):7751. doi: 10.3390/ijerph18157751 (PMC8345370; doi:10.3390/ijerph18157751)
Supplement: Supplementary file 1 [file ijerph-18-07751-s001.zip]

Archive with 8 entries (8 files):
- Devel Paper_Figure S1.pdf
- Devel Paper_Table S1.pdf
- Devel Paper_Table S2.pdf
- Devel Paper_Table S3.pdf
- Devel Paper_Table S4.pdf
- Devel Paper_Table S5.pdf
- Devel Paper_Table S6.pdf
- Devel Paper_Table S7.pdf
